# Supplementary material for: A Direct Mass Spectrometry Method for the Rapid Analysis of Ubiquitous Tire-Derived Toxin N-(1,3-Dimethylbutyl)-N′-phenyl-p-phenylenediamine Quinone (6-PPDQ)
Source: PubMed Central journal article supplement — Environ Sci Technol Lett. 2021 Oct 20;8(12):1051–6. doi: 10.1021/acs.estlett.1c00794 (PMC10906944; doi:10.1021/acs.estlett.1c00794), 2021-10-20
Supplement: ez1c00794_si_001.pdf [file ez1c00794_si_001.pdf]

## Supplementary Information

### **A Direct Mass Spectrometry Method for the Rapid Analysis of a ubiquitous tire derived toxin N-(1,3-dimethylbutyl)-N'-phenyl-p-phenylenediamine quinone (6-PPDQ).**

Joseph Monaghan,<sup>1,2</sup> Angelina Jaeger,<sup>1</sup> Alon R. Agua,<sup>3</sup> Ryan S. Stanton,<sup>3</sup> Michael Pirrung,<sup>3</sup> Chris G. Gill,<sup>1,2,4,5</sup> Erik T. Krogh\*<sup>1,2</sup>

1. Applied Environmental Research Laboratories, Chemistry, Vancouver Island University, 900 Fifth Street, Nanaimo, British Columbia, Canada, V9R 5S5.
2. Department of Chemistry, University of Victoria, PO Box 3055, Victoria, British Columbia, Canada, V8P 5C2.
3. Department of Chemistry, University of California, Riverside, CA, USA, 92521.
4. Department of Chemistry, Simon Fraser University, Burnaby, BC, Canada, V5A 1S6.
5. Department of Environmental and Occupational Health Sciences, University of Washington, Seattle, WA, USA, 98195-1618.

\* Corresponding author

Erik T. Krogh, Applied Environmental Research Laboratories, Department of Chemistry, Vancouver Island University, Erik.Krogh@viu.ca

### Synthesis of 6-PPDQ:

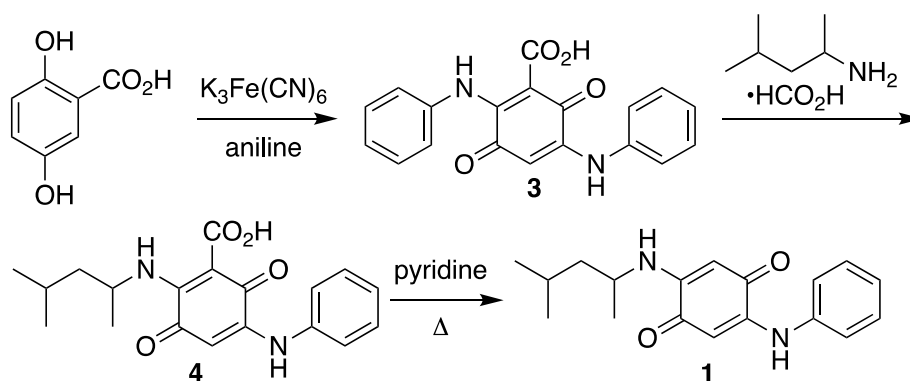

Figure S1. Synthetic scheme for the preparation of 6PPD-quinone.

**3,6-Dioxo-2,5-bis(phenylamino)cyclohexa-1,4-diene-1-carboxylic acid (3).** 2,5 Dihydroxybenzoic acid (200 mg, 1.30 mmol) was dissolved in pH 7.2 phosphate buffer (1 M, 20 mL). Potassium ferricyanide (854.5 mg, 2.600 mmol, 2 eq) was added followed by aniline (326  $\mu$ L, 3.90 mmol, 3 eq), and the reaction mixture was stirred overnight. The solution was extracted with  $CH_2Cl_2$  ( $3 \times 25$  mL) and the organic layers were combined, washed with dil HCl ( $3 \times 25$  mL) and brine ( $2 \times 25$  mL), and dried with sodium sulfate. The solution was concentrated in vacuo, yielding the crude product as a light brown solid (398 mg, 92%) that includes the known compound **3** as well as some impurities. This material was used without further purification.  $^1H$  NMR (500 MHz,  $CDCl_3$ ):  $\delta$  13.85 (s, 1H), 13.32 (s, 1H), 8.04 (s, 1H), 7.42 (m, 4H), 7.35 (m, 2H), 7.27 (m, 2H), 7.18 (d,  $J = 7.6$  Hz, 2H), 5.99 (s, 1H). HRMS (ESI)  $m/z$  [ $M-H$ ] $^-$  calculated for  $C_{19}H_{13}N_2O_4$ : 333.0875, found: 333.0905.

**2-((4-Methylpentan-2-yl)amino)-3,6-dioxo-5-(phenylamino)cyclohexa-1,4-diene-1-carboxylic acid (4).** In a 20 mL scintillation vial, crude compound **3** (125 mg, 374  $\mu$ mol) was dissolved in 10 mL of  $CH_2Cl_2$ . To this solution was added sodium carbonate (79.0 mg, 748  $\mu$ mol, 2 eq). 4-Methylpentan-2-aminium formate (55 mg, 374  $\mu$ mol, 1 eq) was dissolved in 2 mL of  $CH_2Cl_2$  and the solution was added to the reaction mixture by pipette. It was stirred overnight, diluted with 13 mL  $CH_2Cl_2$ , and washed with dilute HCl ( $3 \times 25$  mL) and brine (25 mL). The solution was dried with sodium sulfate and evaporated in

vacuo. The crude product was purified by flash column chromatography ( $\text{CH}_2\text{Cl}_2$ ,  $R_f = 0.37$ ). The resulting red oil was stirred in hexanes overnight to precipitate a bright red solid, which was isolated by filtration to give the title compound (120 mg, 94% for the two steps). Recrystallization gave red plates.  $^1\text{H}$  NMR (500 MHz,  $\text{CDCl}_3$ ):  $\delta$  14.20 (s, 1H), 12.33 (s, 1H), 8.12 (s, 1H), 7.45 (t,  $J = 7.7$  Hz, 2H), 7.28 (m, 1H), 7.26 (m, 2H), 6.05 (s, 1H), 5.17 (m, 1H), 1.65 (m, 2H), 1.44 (m, 1H), 1.33 (d,  $J = 6.3$  Hz, 3H), 0.95 (d,  $J = 6.4$  Hz, 3H), 0.88 (d,  $J = 6.4$  Hz, 3H).  $^{13}\text{C}$  NMR (125 MHz,  $\text{CDCl}_3$ ):  $\delta$  178.9, 178.3, 170.9, 155.7, 146.5, 136.5, 129.8, 126.7, 123.2, 99.6, 95.8, 51.3, 46.6, 25.3, 22.5, 22.3, 21.6. IR (neat) 3244, 2956, 2925, 2870, 1737, 1681, 1614, 1579, 1513, 1466, 1442, 1388, 1366, 1346, 1302, 1230, 1105, 808, 753, 692, 636, 613, 563, 530, 515  $\text{cm}^{-1}$ . HRMS (ESI)  $m/z$  [ $\text{M}-\text{H}$ ] calculated for  $\text{C}_{19}\text{H}_{21}\text{N}_2\text{O}_4$ : 341.1507, found: 341.1533. mp (hexanes) 166.7  $^\circ\text{C}$ .

**2-((4-Methylpentan-2-yl)amino)-5-(phenylamino)cyclohexa-2,5-diene-1,4-dione (1).** Compound **4** (109.8 mg, 0.321 mmol) was dissolved in 20 mL of pyridine and heated at reflux for 5 h. The solution was evaporated in vacuo and the residue was dissolved in  $\text{CH}_2\text{Cl}_2$  and washed three times with 0.1 M HCl and once with brine. The organic layer was dried with sodium sulfate and concentrated in vacuo, yielding the product as a pink solid (89 mg, 93%). Recrystallization from hexanes gave pink needles. The proton NMR spectrum was consistent with that of Tian *et al.* (2021).  $^1\text{H}$  NMR (500 MHz,  $\text{CDCl}_3$ ):  $\delta$  8.25 (s, 1H), 7.42 (t,  $J = 7.7$  Hz, 2H), 7.27 (d,  $J = 7.7$  Hz, 2H), 7.23 (t,  $J = 7.7$  Hz, 1H), 6.41 (d,  $J = 7.5$  Hz, 1H), 5.99 (s, 1H), 5.45 (s, 1H), 3.57 (m, 1H), 1.69 (m, 1H), 1.55 (dt,  $J = 14.1, 7.1$  Hz, 1H), 1.40 (dt,  $J = 14.1, 7.1$  Hz, 1H), 1.24 (d,  $J = 6.4$  Hz, 3H), 0.95 (d,  $J = 6.6$  Hz, 3H), 0.92 (d,  $J = 6.6$  Hz, 3H).  $^{13}\text{C}$  NMR (125 MHz,  $\text{CDCl}_3$ ):  $\delta$  180.1, 178.5, 149.6, 147.7, 137.4, 129.7, 126.1, 122.8, 95.7, 92.8, 46.8, 45.6, 25.1, 22.6, 20.1. IR (neat) 3263, 3227, 2953, 1638, 1556, 1486, 1442, 1355, 1290, 1263, 1209, 1161, 1124, 1078, 1026, 978, 919, 886, 860, 826, 813, 763, 727, 693, 601, 574, 550, 542, 534  $\text{cm}^{-1}$ . HRMS (ESI)  $m/z$  [ $\text{M}-\text{H}$ ] calculated for  $\text{C}_{18}\text{H}_{21}\text{N}_2\text{O}_2$ : 297.1603, found: 297.1623. mp (hexanes) 190.7  $^\circ\text{C}$ .

## 6-PPDQ Standard solution preparation:

A small mass (4.1<sub>4</sub> mg) of solid 6-PPDQ was transferred into a 40 mL glass vial and dissolved in HPLC grade MeOH to a final solution mass of 17.3451<sub>6</sub> g. This resulted in a concentrated stock of 23<sub>8.6</sub> mg/kg. This stock was serially diluted in methanol to prepare sub-stocks of 6-PPDQ at 5.3<sub>9</sub> mg/kg and 12.9 μg/kg, respectively. Aqueous standards were prepared gravimetrically by adding 50 – 200 mg of the latter solution to roughly 35 g of deionized water in a 40 mL vial prior to analysis. For standard addition experiments, 50 – 200 mg of the 12.9 μg/kg stock (by difference) was spiked directly into the 35.0 g sample during analysis. Comparing standard solutions from the prepared stock (synthesized 6-PPDQ) with a commercial analytical standard (ACP Chemicals; 100 μg/mL), the mean calibration slopes agree within 20%. The concentration of all standard solutions prepared using the synthesized 6-PPDQ were subsequently adjusted by the ratio of slopes given in Figure S2 ( $0.3648/0.4345$ ) = 0.839. Subscripted numbers reflect uncertainty in the final digit(s) of measured/calculated values. These values are retained in calculations to avoid rounding errors.

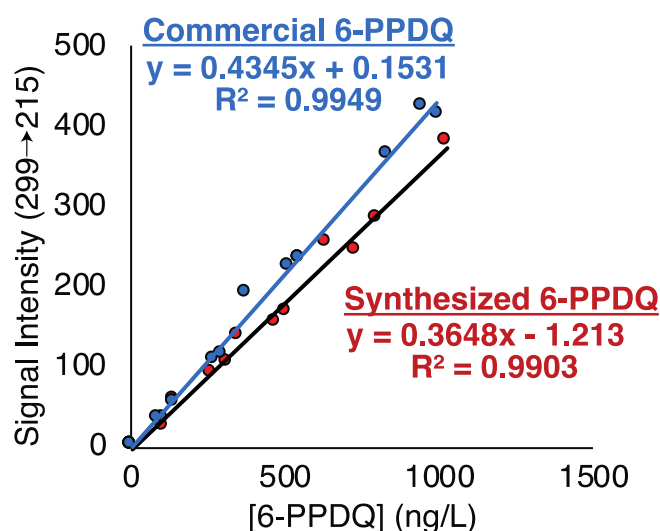

Figure S2. Calibration comparison between two replicate preparations of 6-PPDQ stocks. Average slopes exhibit a percent difference of 17.4%.

**Water Quality data for environmental samples:**

Samples were collected in/around Nanaimo, BC during May/June 2021 and were analyzed for 6-PPDQ within one week of sampling. The time of sampling relative to the start of the rain event was not recorded. For stream samples, the turbidity, pH, specific conductivity, and temperature were measured on-site. Turbidity was measured with a HACH 2100P Turbidimeter. pH, specific conductivity, and temperature were measured with a YSI Proplus Quattro. For stormwater samples, turbidity, pH, and specific conductivity were measured in the lab within 3-5 days of sampling. Turbidity was measured on a HACH 2100P Turbidimeter. pH was measured using a Fisherbrand Accumet AB150 pH meter (probe: 13-620-631 with automatic temperature compensation) calibrated at pH 2, 4, 7, and 10 (98.5% slope). Specific conductivity was measured using an Orion Star A212 Conductivity meter with Orion 013005MD conductivity cell calibrated at 1413  $\mu\text{S}/\text{cm}$  and 12.9  $\text{mS}/\text{cm}$ . Representative environmental sample matrices (seawater, groundwater, and surface water) were collected near the Deep Bay Marine Field Station (Vancouver Island, B.C., CAN). These samples exhibited no detectable 6-PPD or 6-PPDQ before fortification.

*Table S1. Water quality data for fortified and environmental water samples.*

| Type          | Sample    | Turbidity (NTU) | pH   | Specific Conductivity ( $\mu\text{S}/\text{cm}$ ) | Temperature ( $^{\circ}\text{C}$ ) |
|---------------|-----------|-----------------|------|---------------------------------------------------|------------------------------------|
| Fortified*    | Surface   | --              | 7.14 | 60                                                | --                                 |
|               | Ground    | --              | 8.22 | 210                                               | --                                 |
|               | Seawater  | --              | 7.50 | 44400                                             | --                                 |
| Environmental | Stream #1 | 8.55            | 7.44 | 349.7                                             | 13.3                               |
|               | Stream #2 | 8.59            | --   | --                                                | --                                 |
|               | Storm #1  | 291             | 6.68 | 533.9                                             | 12.8                               |
|               | Storm #2  | 285             | 6.63 | 490.0                                             | 12.8                               |
|               | Storm #3  | 2               | 7.05 | 362.8                                             | 16.3**                             |
|               | Storm #4  | 603             | 7.64 | 37.7                                              | 16.3**                             |

\*Data compiled from Monaghan *et al.* (2021).

\*\*Ambient air temperature at time of sampling.

Table S2: MS/MS parameters for 6-PPD quinone and 6-PPD in positive-ion mode.

| Analyte               | 6-PPD Quinone |           |           |           | 6-PPD     |           |
|-----------------------|---------------|-----------|-----------|-----------|-----------|-----------|
| MRM Transition        | 299 → 215     | 299 → 243 | 299 → 256 | 299 → 100 | 269 → 184 | 269 → 107 |
| Entrance voltage (V)  | 12            | 10        | 12        | 7         | 15        | 10        |
| CC lens 2 (V)         | -56           | -56       | -56       | -72       | -56       | -60       |
| Collision energy (eV) | -25           | -28       | -30       | -26       | -38       | -70       |

Dwell time of 1000 ms used for all transitions.

\*In addition to targeted MRMs, fullscan data was collected between  $m/z$  100 – 500 in positive ion mode (step size: 1  $m/z$ , 1 ms dwell time per step). Fullscan data was not used for any of the quantitative data presented in this manuscript, however, the total ion current and mass spectrum was used to monitor for ESI spray stability and co-permeating chemical species.

High resolution, accurate mass analysis was performed on an Orbitrap Exploris™ 120 mass spectrometer (ThermoScientific, San Jose, CA) in positive ion ESI mode. The instrument was mass calibrated with Pierce Flexmix Calibration Solution (Lot #VJ313910; Ref: A39239, Thermo Scientific) immediately before analysis. For these experiments, CP-MIMS membrane permeate was collected offline from a high concentration 6-PPDQ aqueous standard (*ca.* 150  $\mu\text{g/L}$ ) and directly infused at 5  $\mu\text{L/min}$ , capillary voltage: 3500 V, Ion transfer tube: 350 °C, Sheath gas: 5 (arbitrary units), aux gas: 0, sweep gas: 0. A product ion scan of  $m/z$  299  $[\text{M}+\text{H}]^+$  ion of 6-PPDQ yielded previously reported key fragment ions,<sup>1</sup> confirming the identity of the permeant as 6-PPDQ (Figure S3; Table S3).

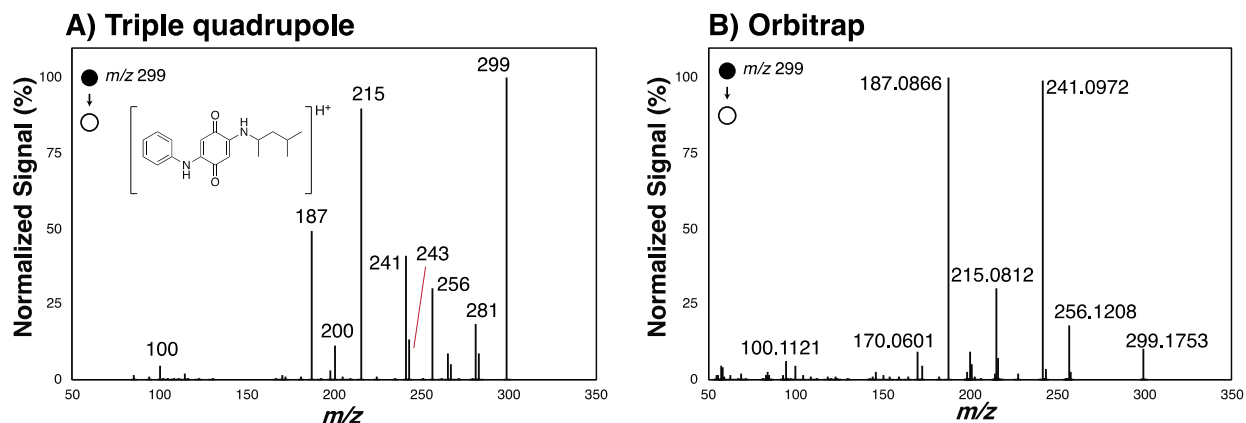

Figure S3. MS/MS product scan mass spectra for 6-PPDQ. A) Direct infusion of ca. 500 ng/kg 6-PPDQ in 15/85/0.03 (v/v/v) heptane/MeOH/formic acid into QSight 220 Triple quadrupole MS. B) Membrane permeate from a high concentration standard of 6-PPDQ directly infused into an Orbitrap™ Exploris 120 mass spectrometer. Key fragment ions observed by Tian *et al.* (2021) are labelled. Differences in relative fragment intensities between the triple quadrupole and orbitrap experiments are attributed to differences in applied collision energies and the instrumentation used. Triple quadrupole conditions – entrance cone voltage: 12 V, collision energy: -30 eV, collision cell lens 2: -56 V. Orbitrap conditions – HCD: 25 eV.

Table S3. Comparison of key 6-PPDQ fragments between CP-MIMS membrane permeate and Tian *et al.* (2021) observed with high resolution, accurate mass MS.

|                           | Observed $m/z$ |          |          |          |          |          |          |
|---------------------------|----------------|----------|----------|----------|----------|----------|----------|
| CP-MIMS permeate          | 299.1753       | 256.1208 | 241.0972 | 215.0812 | 187.0866 | 170.0601 | 100.1121 |
| Tian <i>et al.</i> (2021) | 299.1752       | 256.1205 | 241.0972 | 215.0814 | 187.0866 | 170.0601 | 100.1118 |
| ppm error                 | 0.33           | 1.17     | 0.00     | -0.93    | 0.00     | 0.00     | 3.00     |

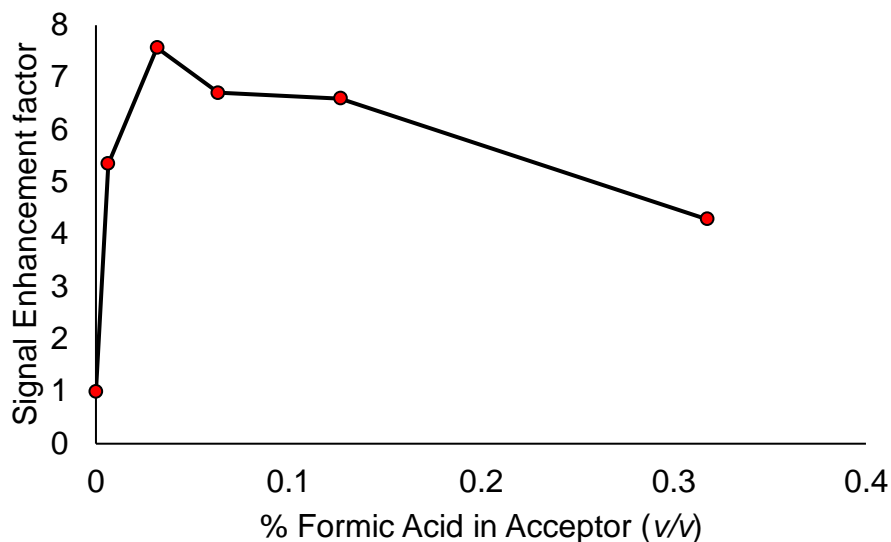

Figure S4. Optimization of formic acid concentration for positive-ion ESI signal enhancement. Aliquots of 15/85 heptane/MeOH with 350 ng/kg 6-PPDQ were spiked with small (<10% by mass) quantities of formic acid in methanol to achieve formic acid concentration between 0.006 – 0.32%. These solutions were directly infused into the ESI capillary at 50  $\mu\text{L}/\text{min}$ , and the signal intensity (299  $\rightarrow$  215) ratio was taken between a given formic acid concentration and a standard with no formic acid added to achieve the signal enhancement factor shown on the y-axis. Maximum enhancement was observed at a formic acid concentration of 0.03% (v/v) and was employed in the acceptor phase for all subsequent work.

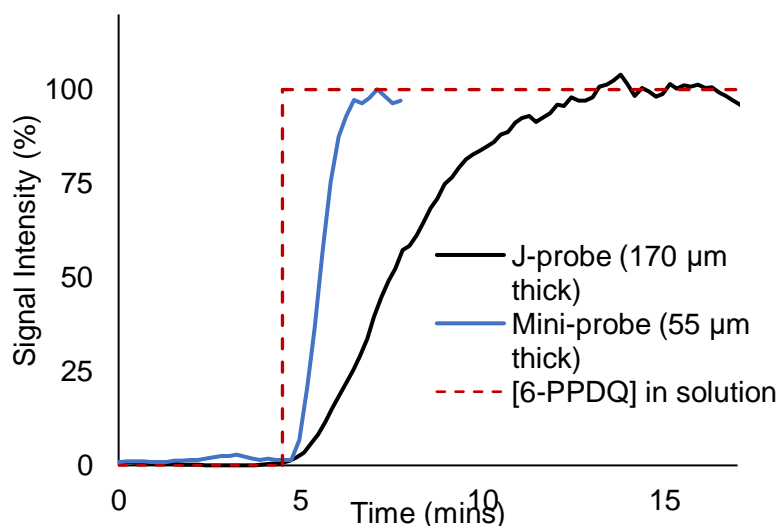

Figure S5. Comparison of risetime between conventional MIMS ‘J-probe’ (170  $\mu\text{m}$  PDMS thickness; black line) and thinner mini-probe (55  $\mu\text{m}$  PDMS thickness; dense PDMS; blue line). Dotted red line indicates the step function increase of 6-PPDQ in the aqueous sample solution. The mini-probe exhibits much faster rise-time ( $t_{10-90\%}=1$  min) over the J-probe ( $t_{10-90\%}=8$  mins).



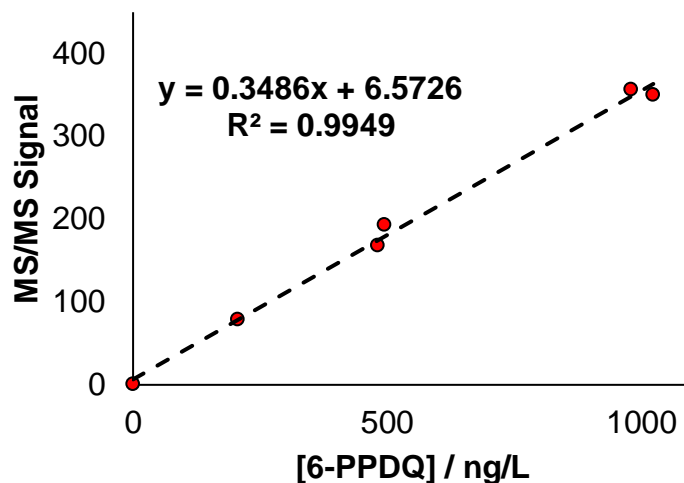

Figure S6. Typical parts-per-trillion level calibration curve for 6-PPDQ in deionized water obtained using CP-MIMS. Points represent the average of 1-3 minutes of steady-state signal intensity. Acceptor phase (15/85/0.03 heptane/MeOH/formic acid) was flowed at 10  $\mu\text{L}/\text{min}$  through the membrane lumen then the ESI capillary.

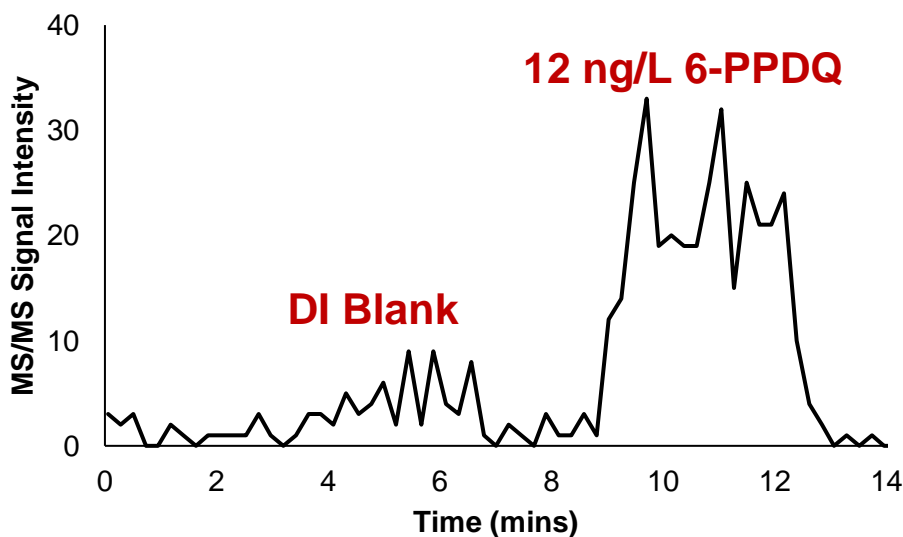

Figure S7. Ion Chromatogram for analysis of a DI blank and a low concentration (12 ng/L) standard of 6-PPDQ. Based on this data, the  $S/N = 3$  detection limit is ca. 8 ng/L.

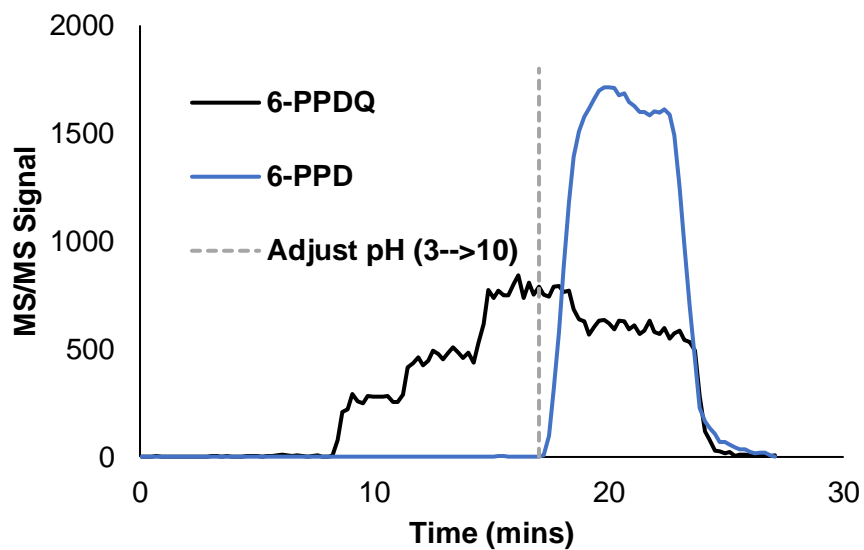

Figure S8. pH-dependent membrane selectivity. At  $t=8$  mins, a combined standard containing both 6-PPD and 6-PPDQ was spiked three times at ca. 3-minute intervals into an aqueous solution at pH 3. Because the  $pK_a$  of 6-PPD is  $\sim 6$ , it is protonated and thus membrane impermeable and only the 6-PPDQ signal appears. At  $t=17$  mins the solution pH is adjusted to 10, deprotonating the 6-PPD and allowing membrane permeation.

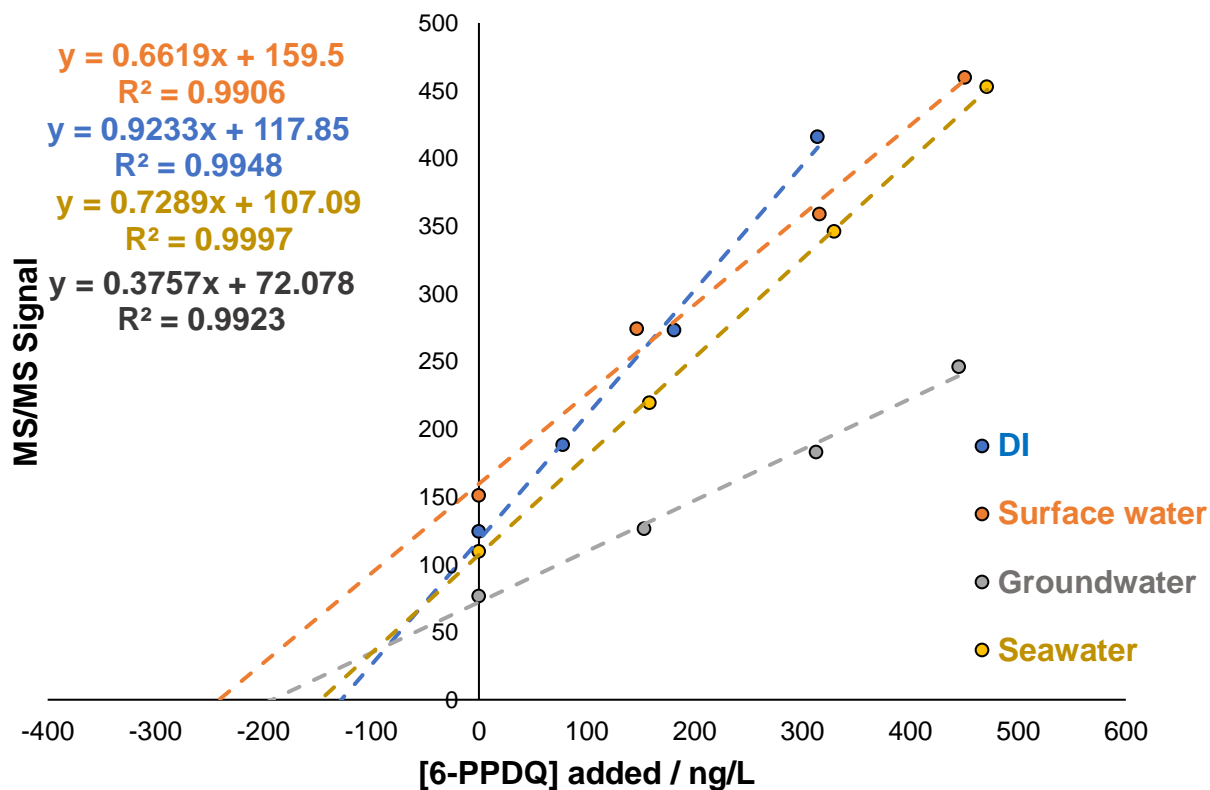

Figure S9. Standard addition analysis of fortified DI water (blue), surface water (orange), groundwater (grey), and seawater (yellow). Points represent the average signal intensity across 1-2 mins of steady-state signal intensity. Percent recoveries range from 88 – 104%; data summarized in Table 1.

Table S4. Summary of data for rapid screening demonstration.

| Sample                            | [6-PPDQ] / ng/L |                   |                        |            |     |     |
|-----------------------------------|-----------------|-------------------|------------------------|------------|-----|-----|
|                                   | DF*             | Measured [6-PPDQ] | Corrected for dilution | Mean       | SD  | RSD |
| Stormwater 1                      | 14.6            | 225               | 3289                   | 3571       | 248 | 6.9 |
|                                   | 19.3            | 195               | 3754                   |            |     |     |
|                                   | 28.7            | 128               | 3671                   |            |     |     |
| Stormwater 2                      | 9.3             | 342               | 3182                   | 3150       | 206 | 6.5 |
|                                   | 11.2            | 298               | 3337                   |            |     |     |
|                                   | 8.9             | 328               | 2930                   |            |     |     |
| Sample                            | DF              | Measured [6-PPDQ] | Loaded [6-PPDQ]        | % Recovery |     |     |
| Fortified Environmental Sample #1 | 1               | 274               | 201                    | 136        |     |     |
| Fortified Environmental Sample #2 | 1               | 269               | 240                    | 112        |     |     |
| Fortified Environmental Sample #3 | 1               | 265               | 180                    | 147        |     |     |

\* DF is dilution factor

Table S5. Summary of measured 6-PPDQ and 6-PPD concentrations desorbed from various rubber materials monitored with CP-MIMS.

| Suspended solid | In Water       |                 |                | "On tire"        |                 |
|-----------------|----------------|-----------------|----------------|------------------|-----------------|
|                 | Loading (mg/L) | [6-PPDQ] / ng/L | [6-PPD] / ng/L | [6-PPDQ] / ng/mg | [6-PPD] / ng/mg |
| 2016 Tire       | 499            | 4255            | 210            | 8.52             | 0.42            |
| 2014 Tire       | 509            | 4009            | 397            | 7.88             | 0.78            |
| 2009 Tire       | 532            | 463             | 70             | 0.87             | 0.13            |
| Artificial Turf | 521            | 59              | BDL            | 0.11             | BDL             |
